# Supplementary material
Source: PubMed Central journal article supplement (PMC7822220)

Figure S9

NM\_001113198

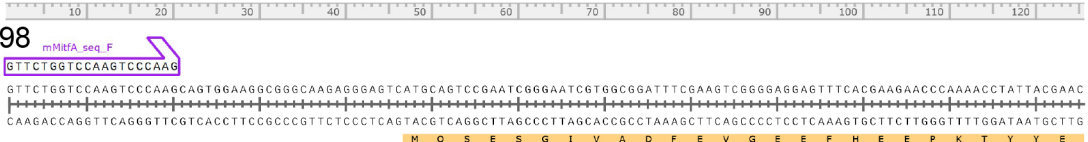

*Mitf-A*<sup>-/-</sup>  
qPCR\_R

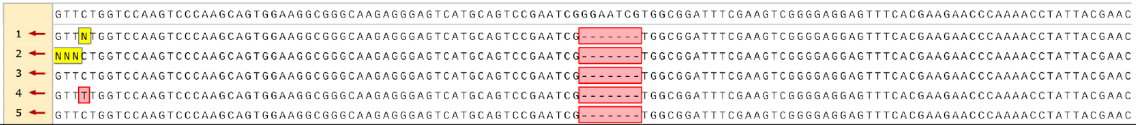

Wildtype  
qPCR\_R

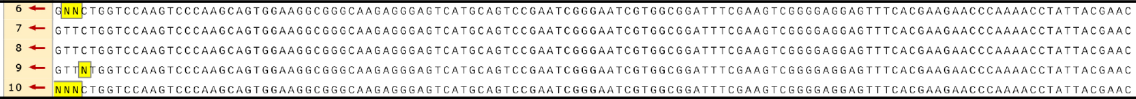

*Mitf-A*<sup>-/-</sup>  
seq\_F

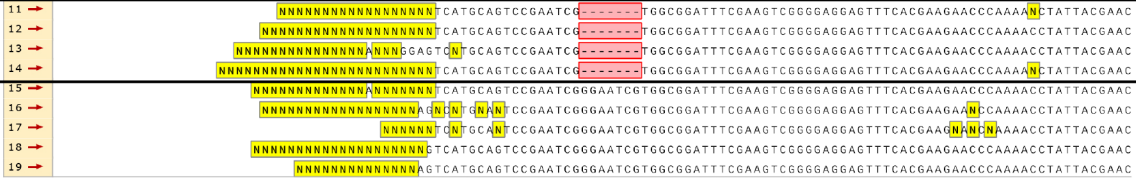

Wildtype  
seq\_F

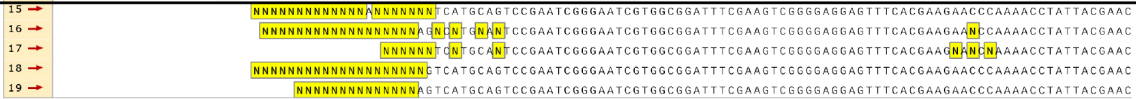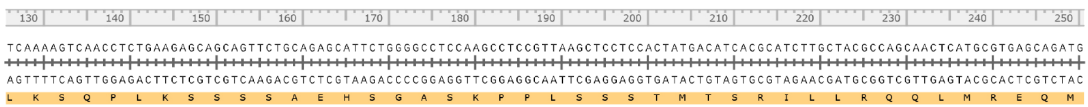

*Mitf-A*<sup>-/-</sup>  
qPCR\_R

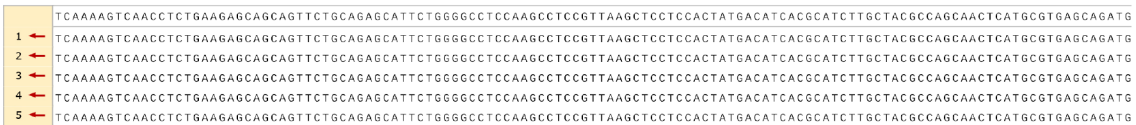

Wildtype  
qPCR\_R

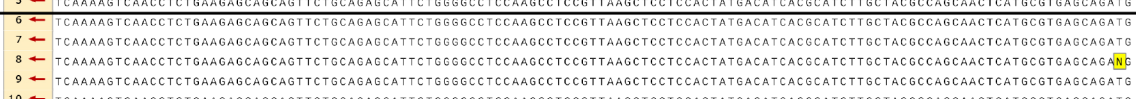

*Mitf-A*<sup>-/-</sup>  
seq\_F

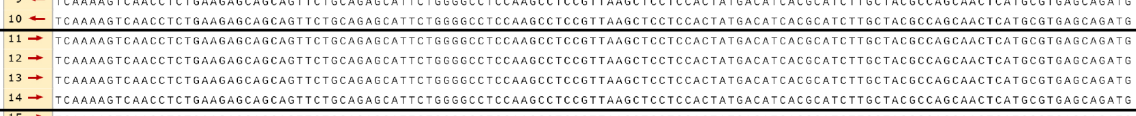

Wildtype  
seq\_F

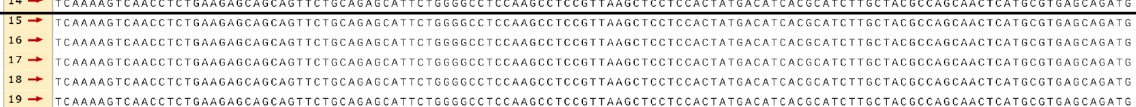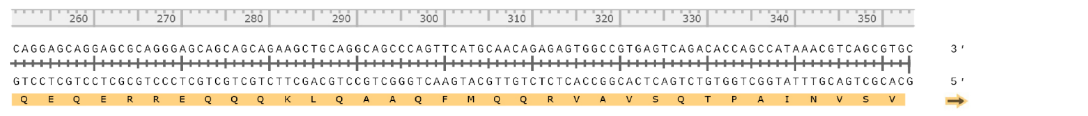

*Mitf-A*<sup>-/-</sup>  
qPCR\_R

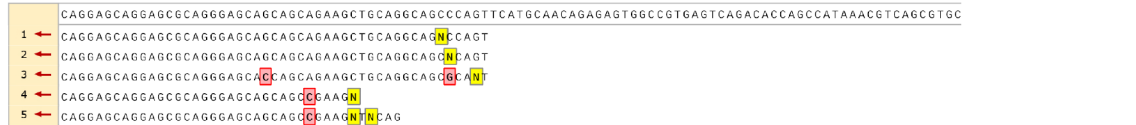

Wildtype  
qPCR\_R

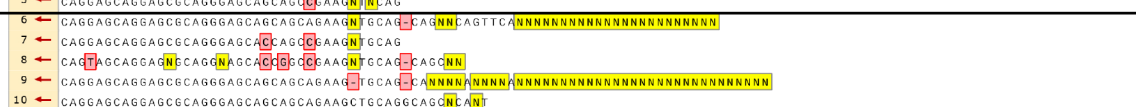

*Mitf-A*<sup>-/-</sup>  
seq\_F

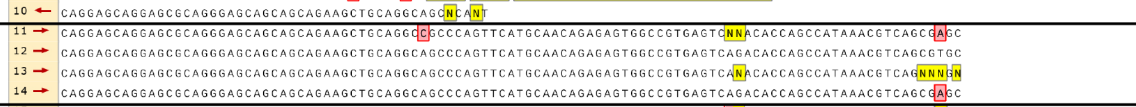

Wildtype  
seq\_F

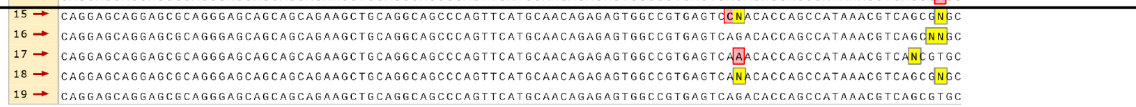

Supplement: NIHMS1656713-supplement-Figure_S9.pdf [file NIHMS1656713-supplement-Figure_S9.pdf]
