# Supplementary material
Source: PubMed Central journal article supplement (PMC7822220)

A

*Mitf-A* CRISPR deletion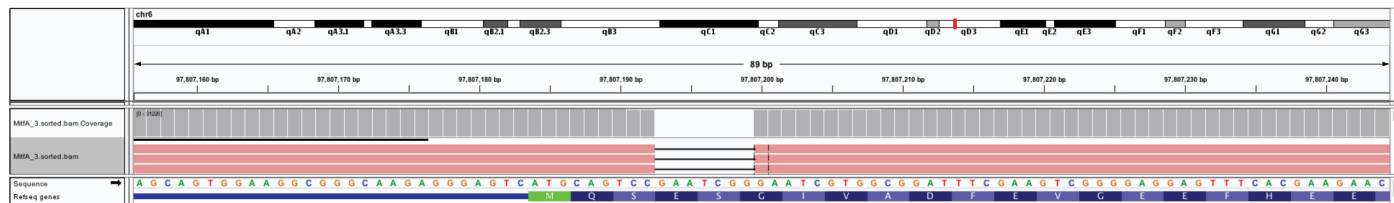

B

*Mitf-A*<sup>+/+</sup> 7bp deletion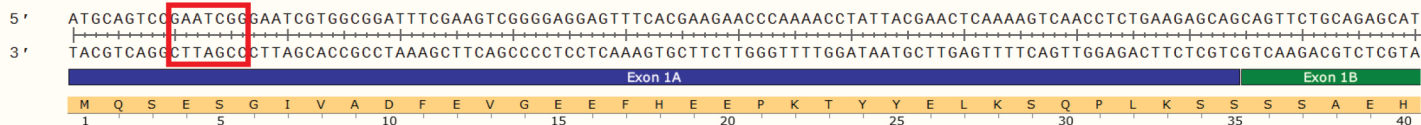*Mitf-A*<sup>-/-</sup>

## deletion

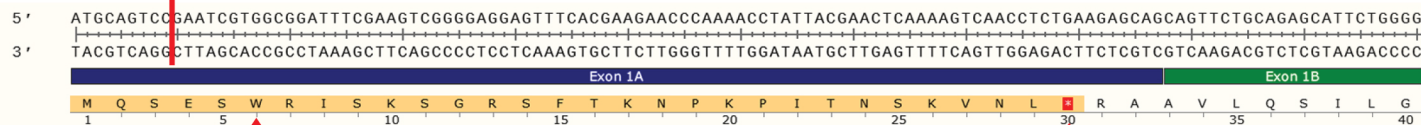

First amino acid change

Premature stop codon

C

*Mitf-M* CRISPR deletion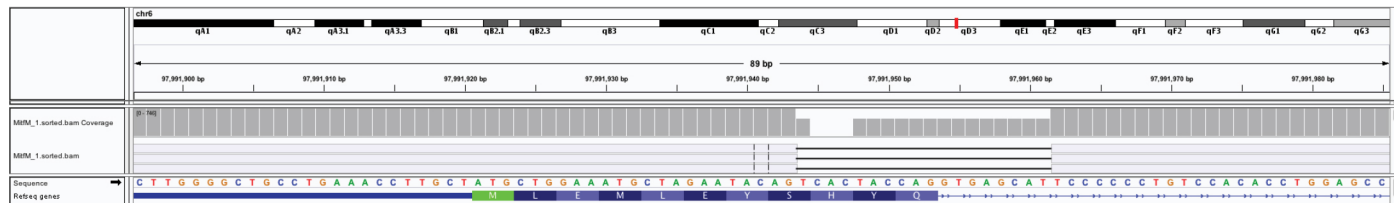

Supplement: NIHMS1656713-supplement-Figure_S3.pdf [file NIHMS1656713-supplement-Figure_S3.pdf]
