# Supplementary material
Source: PubMed Central journal article supplement (PMC7822220)
Supplement: NIHMS1656713-supplement-Table_S1_Panel_of_skin_markers.pdf [file NIHMS1656713-supplement-Table_S1_Panel_of_skin_markers.pdf]

Table S1. Panel of skin cell markers

Genomic Assembly: mm10

|       | gene    | baseMean    | log2FoldChange | lfcSE      | stat       | pvalue    | padj      | G_r1.counts | G_r2.counts | G_r3.counts | G_r4.counts | R_r1.counts | R_r2.counts | R_r3.counts | R_r4.counts |
|-------|---------|-------------|----------------|------------|------------|-----------|-----------|-------------|-------------|-------------|-------------|-------------|-------------|-------------|-------------|
| 4288  | Cd34    | 1286.485668 | -9.512394703   | 0.56576172 | -16.813429 | 1.95E-63  | 6.02E-61  | 0.8317165   | 5.7045818   | 0.8389407   | 5.38889386  | 1763.51764  | 1651.389921 | 3060.4688   | 3803.7448   |
| 5051  | Col17a1 | 3133.467374 | -8.495453819   | 0.74918332 | -11.33962  | 8.35E-30  | 6.01E-28  | 1.663433    | 1.9015273   | 8.3894074   | 44.1889296  | 6558.17293  | 7843.031648 | 4691.49709  | 5918.894    |
| 5065  | Col3a1  | 388.7605229 | -4.515200866   | 1.28083832 | -3.5251919 | 0.0004232 | 0.0019995 | 70.6959025  | 15.212218   | 1.6778815   | 0           | 1870.13074  | 592.3308706 | 313.377345  | 246.65922   |
| 5228  | Crabp1  | 561.6892944 | -6.679708315   | 0.70594219 | -9.462118  | 3.02E-21  | 1.19E-19  | 23.288062   | 8.5568727   | 5.0336444   | 0           | 858.773428  | 1308.837129 | 502.136798  | 1786.8884   |
| 5841  | Dct     | 143254.0727 | 5.026554372    | 0.63134168 | 7.96170213 | 1.70E-15  | 4.06E-14  | 282004.292  | 345156.67   | 238190.38   | 249432.497  | 2732.81658  | 1270.299939 | 10214.0856  | 17031.541   |
| 6570  | Edn2    | 219.2208838 | -10.8140398    | 1.32157517 | -8.1826899 | 2.78E-16  | 7.23E-15  | 0           | 0           | 0           | 0           | 531.109307  | 663.6960358 | 248.319475  | 310.64225   |
| 10916 | Itga8   | 14.93665687 | -5.521543464   | 1.07867802 | -5.118806  | 3.07E-07  | 2.75E-06  | 0.8317165   | 0           | 0.8389407   | 0           | 16.6277315  | 32.82797596 | 21.0750846  | 47.291806   |
| 10961 | Ivl     | 179.8421232 | -9.063974287   | 0.8771811  | -10.333071 | 4.99E-25  | 2.55E-23  | 0           | 0           | 1.6778815   | 0           | 357.985279  | 436.7548106 | 256.566247  | 385.75277   |
| 11434 | Krt14   | 62653.41167 | -8.930936466   | 0.23984934 | -37.23561  | 1.81E-303 | 2.80E-299 | 202.938826  | 232.93709   | 227.35294   | 340.578092  | 100890.228  | 136012.0136 | 136671.007  | 126650.24   |
| 11435 | Krt15   | 22977.82548 | -8.302540179   | 0.43613183 | -19.036767 | 8.46E-81  | 4.36E-78  | 137.233223  | 161.62982   | 53.692207   | 189.689064  | 55518.0393  | 66438.11413 | 35613.2277  | 25710.978   |
| 11460 | Krt5    | 22159.45669 | -8.965211141   | 0.2660466  | -33.697898 | 6.21E-249 | 4.80E-245 | 64.873887   | 112.19011   | 84.733014   | 82.9889654  | 42144.4527  | 57687.31759 | 35163.3205  | 41935.777   |
| 11909 | Lrig1   | 404.2725857 | -4.364412672   | 0.78094527 | -5.5886281 | 2.29E-08  | 2.45E-07  | 30.7735105  | 79.864146   | 20.134578   | 2.15555754  | 1125.79523  | 1387.33881  | 291.385952  | 296.7329    |
| 12364 | Mc1r    | 493.981941  | 4.866961642    | 0.73086886 | 6.65914494 | 2.75E-11  | 4.26E-10  | 886.609789  | 888.964     | 708.06598   | 1351.53458  | 0.97810185  | 34.25527926 | 12.8283124  | 68.619483   |
| 13823 | Mitf    | 2362.920238 | 4.196811926    | 0.37258263 | 11.2641106 | 1.97E-29  | 1.38E-27  | 3595.51043  | 3355.2449   | 3591.5053   | 7406.49572  | 133.999954  | 278.324144  | 247.403167  | 294.87832   |
| 13839 | Mlana   | 10175.6298  | 4.522436903    | 0.73877332 | 6.1215488  | 9.27E-10  | 1.21E-08  | 12178.8247  | 12447.398   | 30003.038   | 23732.6886  | 144.759074  | 97.05662458 | 1011.60406  | 1789.6703   |
| 15174 | Oca2    | 111.448578  | 5.660369961    | 0.72463664 | 7.81132182 | 5.66E-15  | 1.29E-13  | 116.44031   | 281.42604   | 104.86759   | 373.989234  | 0           | 2.854606605 | 3.6652321   | 8.3456128   |
| 16813 | Pdgfrb  | 34.84477569 | -7.229576149   | 1.2047922  | -6.0006831 | 1.96E-09  | 2.45E-08  | 0           | 0.9507636   | 0           | 0           | 119.328426  | 12.84572972 | 73.304642   | 72.328644   |
| 16814 | Pdgfrl  | 39.61715608 | -8.654362634   | 1.43566429 | -6.0281242 | 1.66E-09  | 2.08E-08  | 0           | 0           | 0           | 0           | 85.0948613  | 108.475051  | 74.22095    | 49.146386   |
| 16869 | Pecam1  | 63.41392102 | -7.892296169   | 1.26223193 | -6.2526514 | 4.04E-10  | 5.50E-09  | 0.8317165   | 0           | 0           | 0           | 46.948889   | 19.98224624 | 385.765679  | 53.782838   |
| 17325 | Pmel    | 51573.32419 | 4.612708381    | 0.67754451 | 6.80797837 | 9.90E-12  | 1.61E-10  | 91684.2684  | 105065.09   | 83757.326   | 117311.908  | 1104.27699  | 488.1377295 | 4046.41624  | 9129.1731   |
| 20565 | Sox10   | 1253.897218 | 4.819420235    | 0.68553578 | 7.03015125 | 2.06E-12  | 3.66E-11  | 2245.63455  | 2453.921    | 2182.0849   | 2839.94706  | 34.2335649  | 4.281909908 | 129.199432  | 141.87542   |
| 22701 | Tyr     | 13644.04075 | 4.488311682    | 0.61114638 | 7.34408624 | 2.07E-13  | 4.07E-12  | 24199.6233  | 21330.382   | 24467.707   | 34824.1099  | 469.48889   | 195.5405525 | 1169.20904  | 2496.2655   |
| 22704 | Tyrp1   | 70780.2138  | 4.529546799    | 0.81215624 | 5.57718647 | 2.44E-08  | 2.60E-07  | 103447.235  | 89462.105   | 177752.25   | 175032.35   | 893.985094  | 265.4784143 | 6145.67793  | 13242.633   |
