# Supplementary material
Source: PubMed Central journal article supplement (PMC7822220)
Supplement: NIHMS1656713-supplement-Table_S2_Binding_sites_in_Mitf-M_promoter.pdf [file NIHMS1656713-supplement-Table_S2_Binding_sites_in_Mitf-M_promoter.pdf]

**Table S2. Binding sites in *MITF-M* promoter**

Transcript Accession # NM\_00248

Genome Assembly: hg18

| Location                | +/- | BLS   | BLS   | NLOD  | Z-Score | FDR   | Motif ID | TF Name    | Gene | Distance (bp) | Region   |
|-------------------------|-----|-------|-------|-------|---------|-------|----------|------------|------|---------------|----------|
| chr3:70067507..70067514 | +   | 1.684 | 2.089 | 1     | 4.054   | 0.074 | 0        | MAFA       | MITF | -933          | Upstream |
| chr3:70067506..70067512 | -   | 1.41  | 2.089 | 1     | 3.817   | 0.055 | 0        | MAFB       | MITF | -928          | Upstream |
| chr3:70067895..70067902 | +   | 1.931 | 2.612 | 1     | 3.81    | 0.035 | 0        | ETS2       | MITF | -545          | Upstream |
| chr3:70067982..70068000 | -   | 0.192 | 1.031 | 0.823 | 4.686   | 0.201 | 0.067494 | GCNF       | MITF | -440          | Upstream |
| chr3:70068047..70068055 | -   | 1.143 | 1.467 | 1     | 4.192   | 0.163 | 0.103395 | STAT1      | MITF | -385          | Upstream |
| chr3:70068177..70068188 | +   | 1.355 | 2.376 | 0.916 | 4.485   | 0.288 | 0        | Pax        | MITF | -263          | Upstream |
| chr3:70068202..70068211 | +   | 2.029 | 2.705 | 0.977 | 4.459   | 0.012 | 0        | SF1        | MITF | -238          | Upstream |
| chr3:70068202..70068210 | +   | 1.938 | 2.607 | 0.973 | 4.362   | 0.022 | 0        | SF1        | MITF | -238          | Upstream |
| chr3:70068202..70068209 | +   | 2.677 | 2.737 | 1     | 3.933   | 0.488 | 0.164887 | NURR1      | MITF | -238          | Upstream |
| chr3:70068277..70068288 | +   | 1.573 | 2.515 | 0.919 | 4.403   | 0.028 | 0.017217 | CREB       | MITF | -163          | Upstream |
| chr3:70068279..70068288 | +   | 2.139 | 2.737 | 0.968 | 4.596   | 0.014 | 0.005239 | CREB, ATF  | MITF | -161          | Upstream |
| chr3:70068280..70068288 | +   | 2.515 | 2.515 | 1     | 4.856   | 0.013 | 0        | ATF2:c-Jun | MITF | -160          | Upstream |
| chr3:70068280..70068288 | +   | 2.515 | 2.515 | 1     | 4.782   | 0.035 | 0.015874 | CREB       | MITF | -160          | Upstream |
| chr3:70068280..70068288 | -   | 2.515 | 2.515 | 1     | 4.856   | 0.013 | 0        | ATF2:c-Jun | MITF | -152          | Upstream |
| chr3:70068280..70068288 | -   | 2.515 | 2.515 | 1     | 4.782   | 0.035 | 0.015874 | CREB       | MITF | -152          | Upstream |
| chr3:70068280..70068289 | -   | 2.135 | 2.737 | 0.927 | 4.296   | 0.019 | 0.00943  | CREB, ATF  | MITF | -151          | Upstream |
| chr3:70068379..70068396 | +   | 0.925 | 2.312 | 0.908 | 4.662   | 0.195 | 0.126351 | Octamer    | MITF | -61           | Upstream |
| chr3:70068379..70068395 | +   | 0.526 | 2.312 | 0.842 | 4.447   | 0.12  | 0.054055 | HOXA1      | MITF | -61           | Upstream |
| chr3:70068379..70068395 | +   | 0.002 | 2.312 | 0.858 | 4.279   | 0.296 | 0.215901 | Barhl-1    | MITF | -61           | Upstream |
| chr3:70068380..70068397 | +   | 1.233 | 2.312 | 0.918 | 4.936   | 0.1   | 0.065    | K-2b       | MITF | -60           | Upstream |
| chr3:70068380..70068397 | +   | 1.316 | 2.312 | 0.934 | 4.73    | 0.084 | 0.032656 | ALX-3      | MITF | -60           | Upstream |
| chr3:70068380..70068397 | +   | 1.729 | 2.312 | 0.894 | 4.689   | 0     | 0        | Lhx4       | MITF | -60           | Upstream |
| chr3:70068380..70068397 | +   | 1.145 | 2.312 | 0.9   | 4.447   | 0.171 | 0.07348  | LH-2       | MITF | -60           | Upstream |
| chr3:70068380..70068397 | +   | 0.559 | 2.312 | 0.881 | 4.42    | 0.173 | 0.106641 | Evx-1      | MITF | -60           | Upstream |
| chr3:70068380..70068397 | +   | 0.043 | 2.312 | 0.857 | 4.319   | 0.17  | 0.14261  | Pax-4      | MITF | -60           | Upstream |
| chr3:70068381..70068397 | +   | 0.35  | 2.312 | 0.902 | 4.284   | 0.165 | 0.064201 | Barx-2     | MITF | -59           | Upstream |
| chr3:70068381..70068397 | +   | 0.002 | 2.312 | 0.882 | 4.278   | 0.202 | 0.101899 | ipf1       | MITF | -59           | Upstream |
| chr3:70068382..70068396 | +   | 1.735 | 2.737 | 0.908 | 4.759   | 0.083 | 0.054038 | CHX10      | MITF | -58           | Upstream |
| chr3:70068384..70068394 | -   | 0.835 | 2.312 | 0.965 | 4.437   | 0.082 | 0.001928 | ipf1       | MITF | -46           | Upstream |
| chr3:70068379..70068395 | -   | 0.338 | 2.312 | 0.877 | 4.444   | 0.233 | 0.156188 | HOXA5      | MITF | -45           | Upstream |
| chr3:70068379..70068395 | -   | 0.368 | 2.312 | 0.915 | 4.394   | 0.183 | 0.075767 | Barx-2     | MITF | -45           | Upstream |
| chr3:70068379..70068395 | -   | 0.077 | 2.312 | 0.851 | 4.343   | 0.29  | 0.206274 | HoxA2      | MITF | -45           | Upstream |
| chr3:70068379..70068396 | -   | 1.738 | 2.312 | 0.954 | 5.255   | 0     | 0        | Lhx4       | MITF | -44           | Upstream |
| chr3:70068379..70068396 | -   | 1.318 | 2.312 | 0.941 | 4.79    | 0.094 | 0.030396 | ALX-3      | MITF | -44           | Upstream |
| chr3:70068379..70068396 | -   | 1.158 | 2.312 | 0.932 | 4.736   | 0.207 | 0.080117 | LH-2       | MITF | -44           | Upstream |
| chr3:70068379..70068396 | -   | 0.767 | 2.312 | 0.889 | 4.657   | 0.107 | 0.053699 | Gbx2       | MITF | -44           | Upstream |
| chr3:70068379..70068396 | -   | 0.568 | 2.312 | 0.892 | 4.523   | 0.194 | 0.120386 | Evx-1      | MITF | -44           | Upstream |
| chr3:70068379..70068396 | -   | 0.364 | 2.312 | 0.874 | 4.47    | 0.23  | 0.151346 | EMX2       | MITF | -44           | Upstream |
| chr3:70068379..70068396 | -   | 0.211 | 2.312 | 0.849 | 4.422   | 0.236 | 0.038607 | lhx6.1     | MITF | -44           | Upstream |

|                         |   |       |       |       |       |       |          |        |      |      |            |
|-------------------------|---|-------|-------|-------|-------|-------|----------|--------|------|------|------------|
| chr3:70068379..70068396 | - | 0.284 | 2.312 | 0.893 | 4.395 | 0.148 | 0.099891 | Shox2  | MITF | -44  | Upstream   |
| chr3:70068379..70068396 | - | 0.043 | 2.312 | 0.857 | 4.314 | 0.166 | 0.139458 | Pax-4  | MITF | -44  | Upstream   |
| chr3:70068379..70068396 | - | 1.214 | 2.312 | 0.852 | 4.309 | 0.068 | 0.04563  | K-2b   | MITF | -44  | Upstream   |
| chr3:70068381..70068397 | - | 0.536 | 2.312 | 0.857 | 4.596 | 0.131 | 0.054031 | HOXA1  | MITF | -43  | Upstream   |
| chr3:70068380..70068397 | - | 0.111 | 2.312 | 0.881 | 4.34  | 0.247 | 0.166681 | Esx1   | MITF | -43  | Upstream   |
| chr3:70068383..70068397 | - | 0.162 | 2.312 | 0.91  | 4.337 | 0.178 | 0.127473 | HOXA3  | MITF | -43  | Upstream   |
| chr3:70068383..70068397 | - | 0.024 | 2.312 | 0.898 | 4.293 | 0.191 | 0.141397 | Dlx-1  | MITF | -43  | Upstream   |
| chr3:70068426..70068435 | - | 1.504 | 2.376 | 0.929 | 4.531 | 0.113 | 0.047217 | ELK4   | MITF | -5   | Upstream   |
| chr3:70069036..70069046 | - | 0.464 | 1.935 | 0.982 | 4.519 | 0.49  | 0.078064 | Nkx2-2 | MITF | 606  | Downstream |
| chr3:70069118..70069135 | - | 0.077 | 1.184 | 0.859 | 4.417 | 0.491 | 0.34801  | Otx2   | MITF | 695  | Downstream |
| chr3:70069426..70069443 | + | 0.129 | 1.137 | 0.871 | 4.43  | 0.221 | 0.138776 | PMX2B  | MITF | 986  | Downstream |
| chr3:70069426..70069442 | + | 0.309 | 1.621 | 0.893 | 4.404 | 0.172 | 0.094936 | PMX2A  | MITF | 986  | Downstream |
| chr3:70069427..70069444 | + | 0.271 | 1.071 | 0.869 | 4.428 | 0.157 | 0.134465 | Pax-4  | MITF | 987  | Downstream |
| chr3:70069427..70069444 | + | 0.222 | 1.796 | 0.872 | 4.408 | 0.165 | 0.115194 | POU6F1 | MITF | 987  | Downstream |
| chr3:70069427..70069444 | + | 0.133 | 1.399 | 0.883 | 4.303 | 0.14  | 0.098622 | Shox2  | MITF | 987  | Downstream |
| chr3:70069429..70069443 | + | 1.155 | 2.098 | 0.89  | 4.604 | 0.142 | 0.086475 | CHX10  | MITF | 989  | Downstream |
| chr3:70069427..70069441 | - | 1.147 | 2.098 | 0.851 | 4.27  | 0.103 | 0.071226 | CHX10  | MITF | 1001 | Downstream |
| chr3:70069426..70069443 | - | 0.121 | 1.251 | 0.869 | 4.502 | 0.396 | 0.311282 | HOXC4  | MITF | 1003 | Downstream |
| chr3:70069426..70069443 | - | 0.107 | 1.031 | 0.883 | 4.453 | 0.48  | 0.331461 | HOXC5  | MITF | 1003 | Downstream |
| chr3:70069426..70069443 | - | 0.122 | 1.39  | 0.858 | 4.343 | 0.229 | 0.179117 | Alx-4  | MITF | 1003 | Downstream |
