# Supplementary material
Source: PubMed Central journal article supplement (PMC7822220)
Supplement: NIHMS1656713-supplement-Table_S3_Binding_sites_in_Mitf-A_promoter.pdf [file NIHMS1656713-supplement-Table_S3_Binding_sites_in_Mitf-A_promoter.pdf]

**Table S3. Binding Sites in *MITF-A* promoter**

Transcript Accession # NM\_198159

Genome Assembly: hg18

| Location                | +/- | BBLs  | BLS   | NLOD  | Z-Score | FDR   | Motif ID | TF Name          | Gene | Distance (bp) | Region     |
|-------------------------|-----|-------|-------|-------|---------|-------|----------|------------------|------|---------------|------------|
| chr3:69870544..69870561 | -   | 0.242 | 1.57  | 0.857 | 4.316   | 0.193 | 0.017745 | RXR::RAR_DR5     | MITF | -714          | Upstream   |
| chr3:69870735..69870762 | -   | 0.554 | 1.898 | 0.817 | 4.578   | 0.276 | 0.17229  | GR               | MITF | -513          | Upstream   |
| chr3:69870735..69870762 | -   | 0.341 | 1.665 | 0.793 | 4.538   | 0.404 | 0.239734 | PR               | MITF | -513          | Upstream   |
| chr3:69870944..69870955 | +   | 1.024 | 1.805 | 0.935 | 4.552   | 0.474 | 0.368917 | AhR              | MITF | -331          | Upstream   |
| chr3:69870946..69870955 | +   | 1.117 | 1.805 | 0.949 | 4.353   | 0.41  | 0.269831 | AhR, Arnt, HIF-1 | MITF | -329          | Upstream   |
| chr3:69871055..69871062 | +   | 1.868 | 2.591 | 1     | 4.241   | 0.365 | 0.176799 | MZF1             | MITF | -220          | Upstream   |
| chr3:69871080..69871086 | +   | 2.591 | 2.591 | 1     | 3.817   | 0.026 | 0        | MAFB             | MITF | -195          | Upstream   |
| chr3:69871078..69871085 | -   | 2.516 | 2.591 | 1     | 4.054   | 0.058 | 0        | MAFA             | MITF | -190          | Upstream   |
| chr3:69871127..69871138 | -   | 1.241 | 2.794 | 0.878 | 4.39    | 0.116 | 0.070463 | MYC::MAX         | MITF | -137          | Upstream   |
| chr3:69871149..69871156 | +   | 2.459 | 2.794 | 1     | 3.933   | 0.484 | 0.182584 | NURR1            | MITF | -126          | Upstream   |
| chr3:69871150..69871172 | +   | 2.34  | 2.794 | 0.952 | 6.758   | 0     | 0        | LM4_M2           | MITF | -125          | Upstream   |
| chr3:69871144..69871165 | -   | 0.601 | 2.154 | 0.89  | 4.818   | 0.038 | 0.007155 | Staf             | MITF | -110          | Upstream   |
| chr3:69871184..69871191 | -   | 1.986 | 2.794 | 1     | 4.241   | 0.358 | 0.172302 | MZF1             | MITF | -84           | Upstream   |
| chr3:69871199..69871209 | +   | 0.551 | 1.028 | 0.924 | 4.319   | 0.059 | 0        | NF-kappaB        | MITF | -76           | Upstream   |
| chr3:69871199..69871210 | +   | 0.477 | 1.159 | 0.896 | 4.37    | 0.216 | 0.031858 | NFKB1            | MITF | -76           | Upstream   |
| chr3:69871199..69871209 | -   | 0.45  | 1.159 | 0.897 | 4.416   | 0.074 | 0        | NF-kappaB (p50)  | MITF | -66           | Upstream   |
| chr3:69871200..69871210 | -   | 0.555 | 1.028 | 0.936 | 4.412   | 0.052 | 0        | NF-kappaB        | MITF | -65           | Upstream   |
| chr3:69871200..69871210 | -   | 0.759 | 1.296 | 0.975 | 4.72    | 0.052 | 0        | REL              | MITF | -65           | Upstream   |
| chr3:69871199..69871210 | -   | 0.477 | 1.159 | 0.888 | 4.303   | 0.23  | 0.018875 | NFKB1            | MITF | -65           | Upstream   |
| chr3:69871200..69871210 | -   | 0.763 | 1.296 | 0.975 | 4.714   | 0.338 | 0.057601 | c-Rel            | MITF | -65           | Upstream   |
| chr3:69871198..69871214 | -   | 0.362 | 1.028 | 0.884 | 4.454   | 0.165 | 0.07197  | NF-kappaB        | MITF | -61           | Upstream   |
| chr3:69871219..69871241 | -   | 1.417 | 2.794 | 0.843 | 5.562   | 0     | 0        | LM4_M2           | MITF | -34           | Upstream   |
| chr3:69871553..69871559 | +   | 2.612 | 2.695 | 1     | 3.989   | 0.007 | 0        | Neuro D          | MITF | 278           | Downstream |
| chr3:69871547..69871558 | -   | 1.716 | 2.391 | 0.957 | 4.454   | 0.08  | 0.008152 | TGIF             | MITF | 283           | Downstream |
| chr3:69871553..69871559 | -   | 2.612 | 2.695 | 1     | 3.989   | 0.007 | 0        | Neuro D          | MITF | 284           | Downstream |
| chr3:69871546..69871562 | -   | 0.054 | 2.019 | 0.871 | 4.321   | 0.161 | 0.048591 | PKNOX2           | MITF | 287           | Downstream |
| chr3:69871546..69871562 | -   | 0.439 | 2.182 | 0.84  | 4.405   | 0.257 | 0.174713 | TGIF2            | MITF | 287           | Downstream |
| chr3:69871640..69871658 | -   | 1.024 | 2.337 | 0.836 | 4.387   | 0.071 | 0.032818 | ESR2             | MITF | 383           | Downstream |
| chr3:69871641..69871661 | -   | 0.869 | 2.486 | 0.792 | 4.39    | 0.064 | 0.010943 | ESR1             | MITF | 386           | Downstream |
| chr3:69871646..69871664 | -   | 0.341 | 1.456 | 0.818 | 4.353   | 0.434 | 0.275125 | MIF-1            | MITF | 389           | Downstream |
| chr3:69871668..69871686 | -   | 1.026 | 2.337 | 0.842 | 4.439   | 0.067 | 0.026511 | ESR2             | MITF | 411           | Downstream |
| chr3:69871813..69871823 | +   | 1.128 | 2.106 | 0.989 | 4.563   | 0.009 | 0        | TAL1             | MITF | 538           | Downstream |
| chr3:69871813..69871822 | +   | 1.335 | 1.485 | 1     | 4.335   | 0.014 | 0        | AP-4             | MITF | 538           | Downstream |
| chr3:69871813..69871821 | +   | 1.455 | 1.688 | 1     | 4.607   | 0.016 | 0        | HEB              | MITF | 538           | Downstream |
| chr3:69871815..69871821 | +   | 1.912 | 2.103 | 1     | 3.989   | 0.013 | 0        | Neuro D          | MITF | 540           | Downstream |
| chr3:69871815..69871821 | -   | 1.912 | 2.103 | 1     | 3.989   | 0.013 | 0        | Neuro D          | MITF | 546           | Downstream |
| chr3:69871818..69871825 | -   | 1.771 | 2.103 | 1     | 4.054   | 0.07  | 0        | MAFA             | MITF | 550           | Downstream |
| chr3:69871839..69871846 | +   | 1.509 | 1.632 | 1     | 4.241   | 0.423 | 0.208925 | MZF1             | MITF | 564           | Downstream |
| chr3:69872140..69872149 | +   | 1.524 | 1.844 | 1     | 4.003   | 0.074 | 0.019945 | PUR1             | MITF | 865           | Downstream |
