# Supplementary material
Source: PubMed Central journal article supplement (PMC7822220)
Supplement: NIHMS1656713-supplement-Table_S5_List_of_genotyping_primers.pdf [file NIHMS1656713-supplement-Table_S5_List_of_genotyping_primers.pdf]

**Table S5. List of genotyping primers**

| Primer        | Sequence 5' to 3'                                | Denaturation   | Amplification                                           |
|---------------|--------------------------------------------------|----------------|---------------------------------------------------------|
| Mitf-A For    | CGCTCTGGTGTGAGAGTAAAC                            | 94°C for 2 min | (94°C for 30 sec, 60°C for 30 sec, 68°C for 1 min) 35x  |
| Mitf-A Rev    | TCACCACTCTCATGCTCTTCA                            |                |                                                         |
| Mitf-M1 For   | GACTAAGTGGTCTGCGGTGTC                            | 94°C for 2 min | (94°C for 30 sec, 55°C for 30 sec, 68°C for 1 min) 35x  |
| Mitf-M2 For   | GTCACTACCAGGTGAGCATT                             |                |                                                         |
| Mitf-M Rev    | GATCTGTCCCCTTTTCGAATCGG                          |                |                                                         |
| ROSA mTmG For | CTCTGCTGCCTCCTGGCTTCT                            | 94°C for 2 min | (95°C for 30 sec, 60°C for 1 min, 72°C for 1min) 35x    |
| ROSA mTmG Rev | TCAATGGGCGGGGGTCGTT                              |                |                                                         |
| Cre For       | GGTGTCCAATTTACTGACCGTACA                         |                |                                                         |
| Cre Rev       | CGGATCCC GCCGATAACCAGTG                          |                |                                                         |
| mCrb1 For1    | GTGAAGACAGCTACAGTTCTGATC                         | 94°C for 5 min | (94°C for 30 sec, 56°C for 30 sec, 72°C for 30 sec) 35x |
| mCrb1 Rev     | GCCCCATTTGCACACTGATGAC                           |                |                                                         |
| mCrb1 For2    | GCCCCTGTTTGCATGGAGGAAACTTGGAAGACAGCTACAGTTCTTCTG |                | Final extension: 72 °C for 7 min                        |
