# Supplementary material
Source: PubMed Central journal article supplement (PMC7822220)

Figure S1

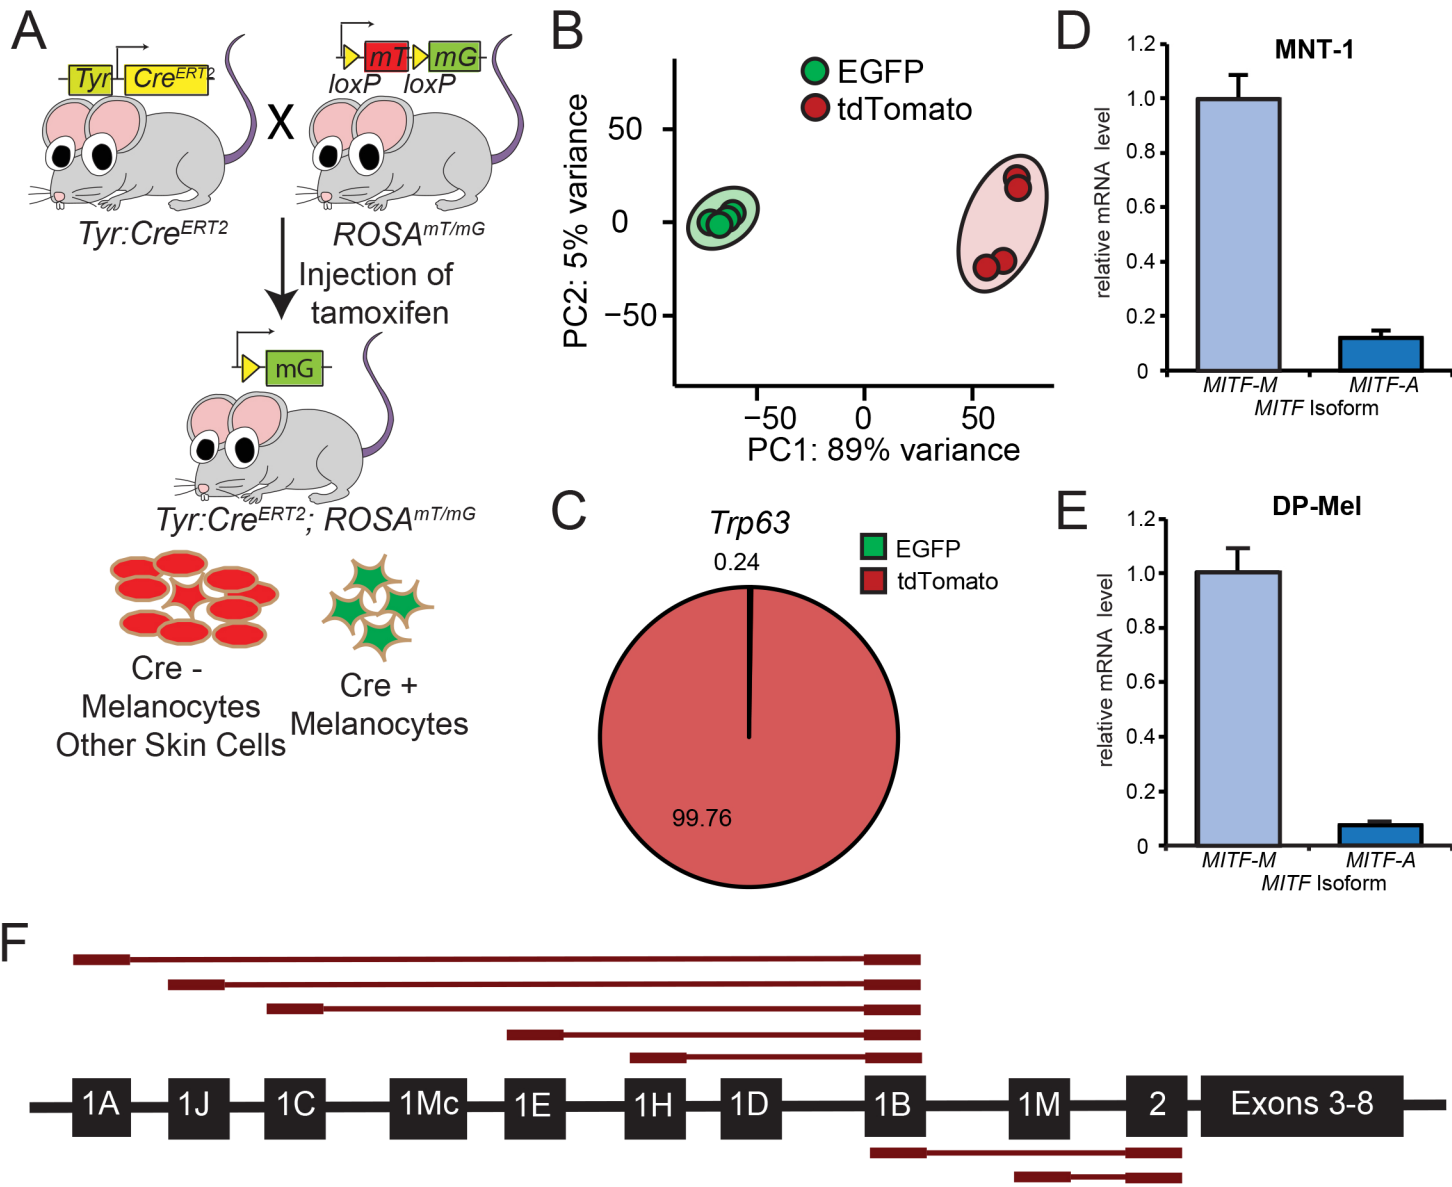

Supplement: NIHMS1656713-supplement-Figure_S1.pdf [file NIHMS1656713-supplement-Figure_S1.pdf]

Figure S4

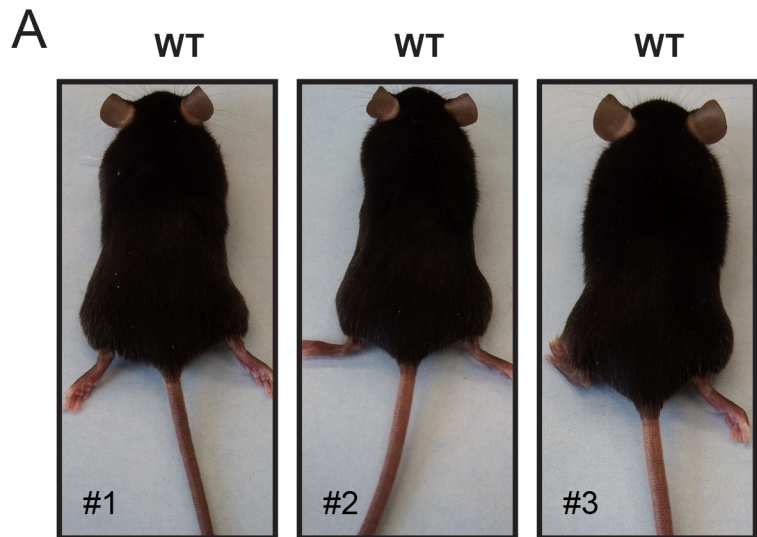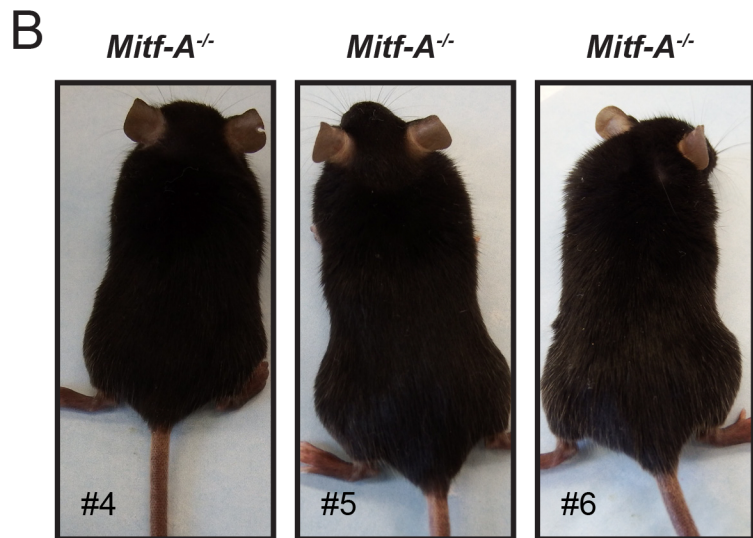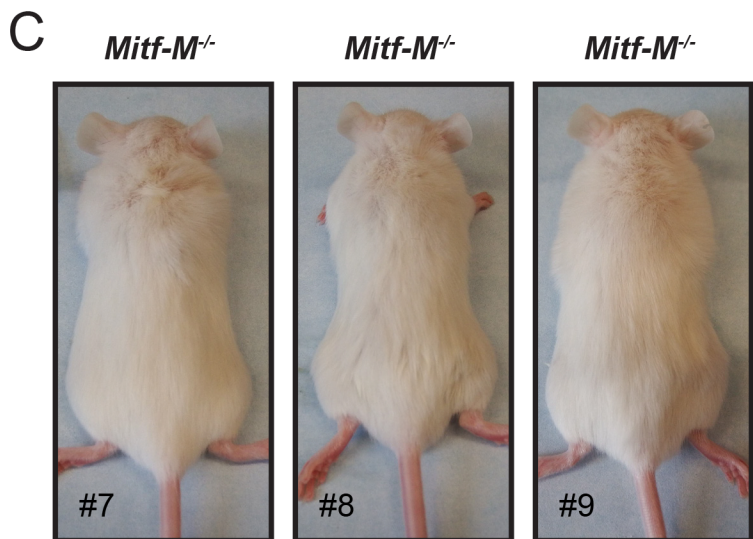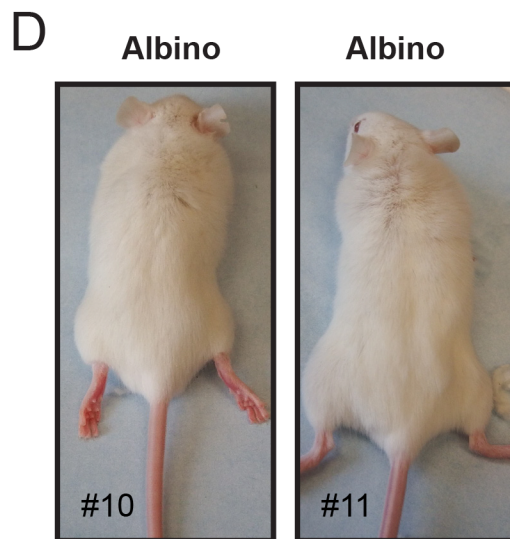

Supplement: NIHMS1656713-supplement-Figure_S4.pdf [file NIHMS1656713-supplement-Figure_S4.pdf]

Figure S5

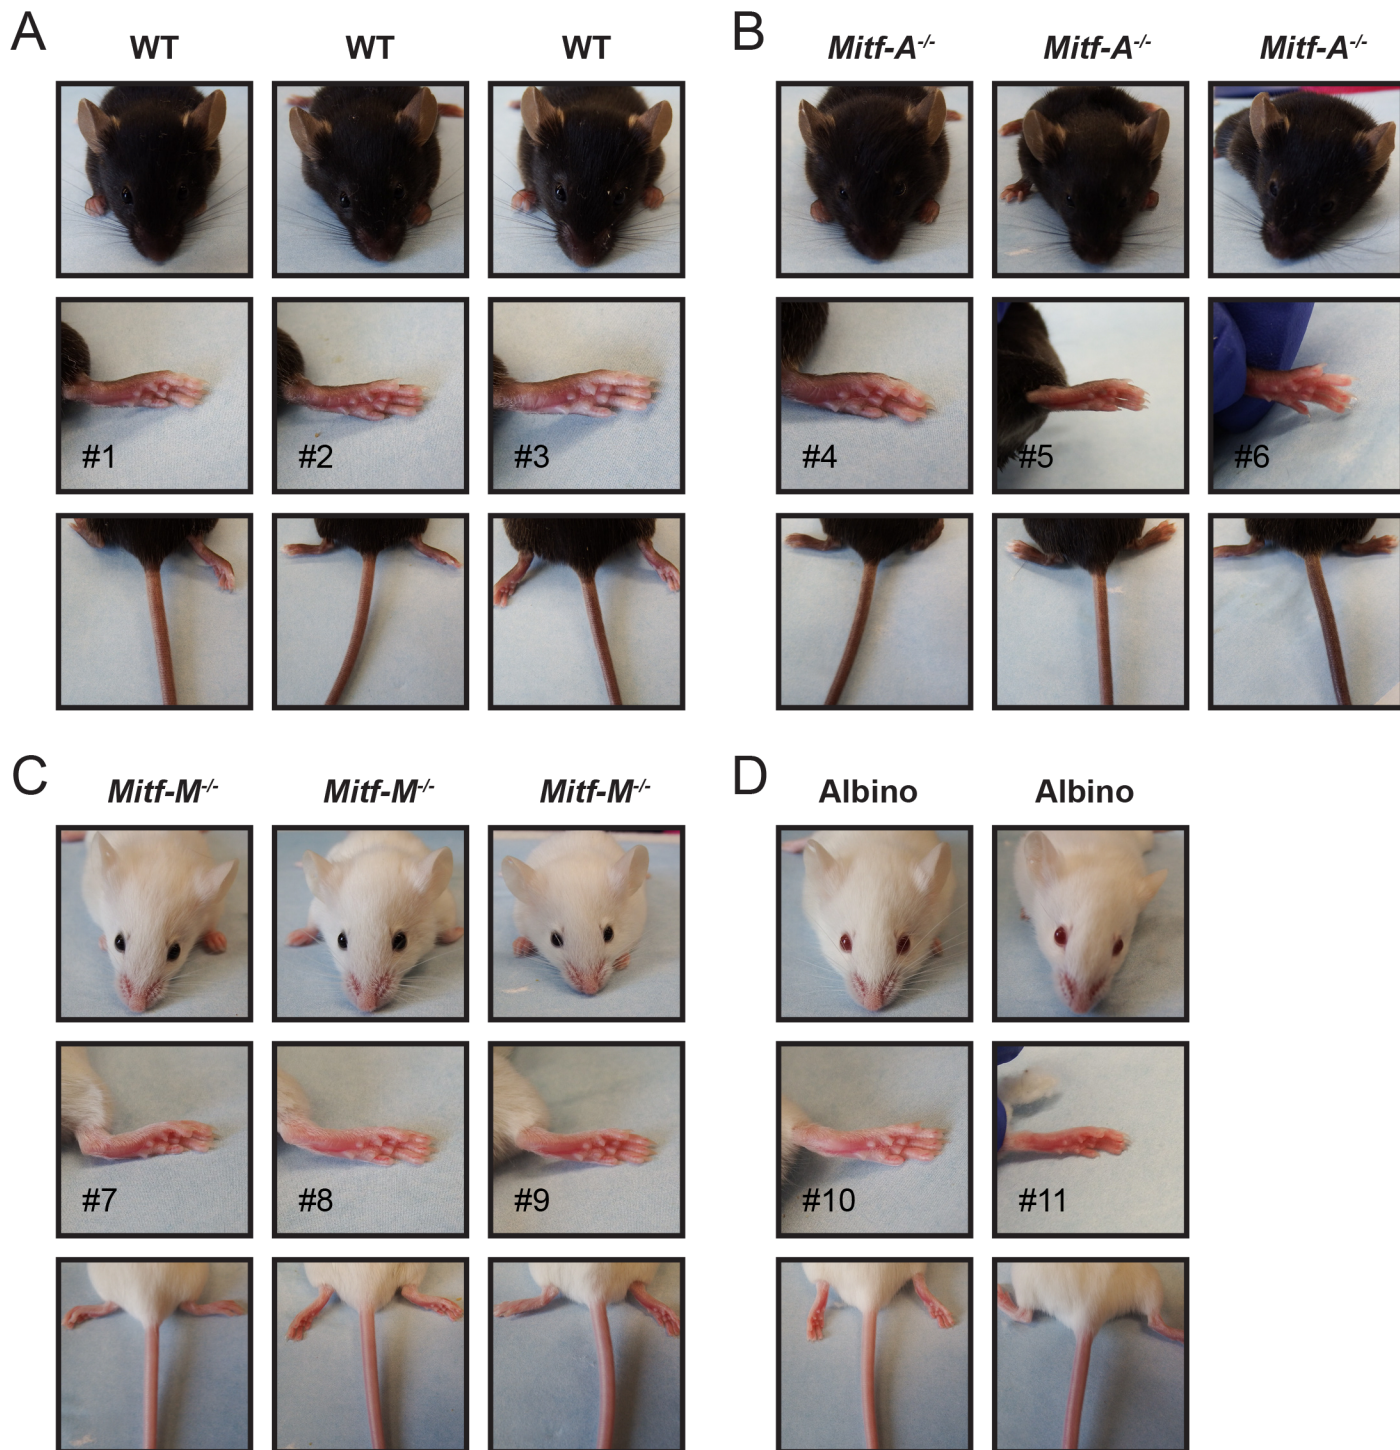

Supplement: NIHMS1656713-supplement-Figure_S5.pdf [file NIHMS1656713-supplement-Figure_S5.pdf]

Figure S6

**A**

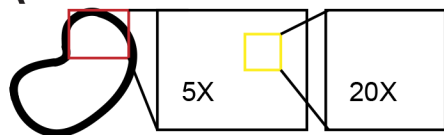

**B**

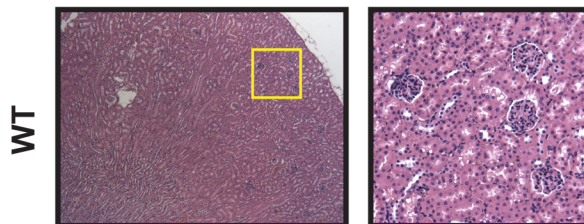

WT

**E**

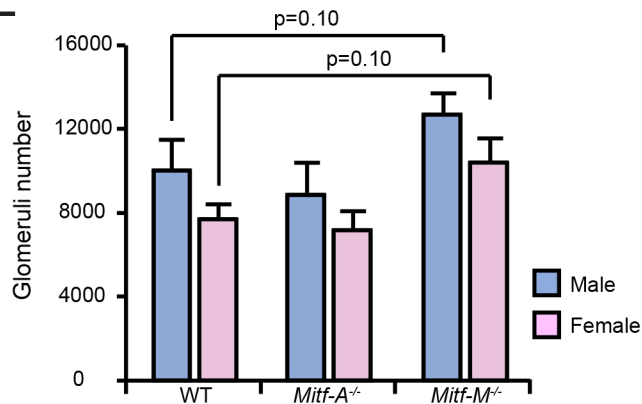

**C**

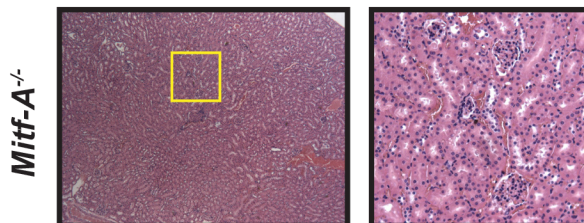

*Mitf-A*<sup>-/-</sup>

**F**

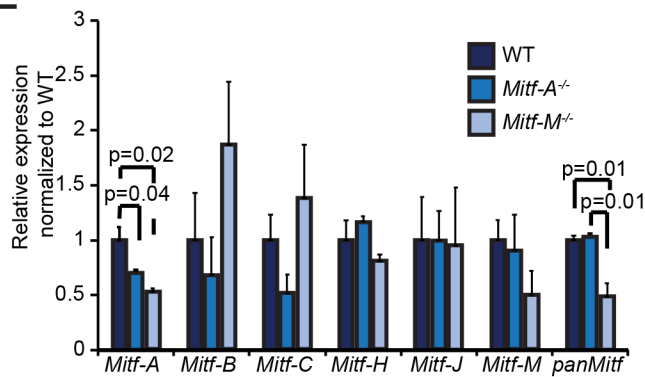

**D**

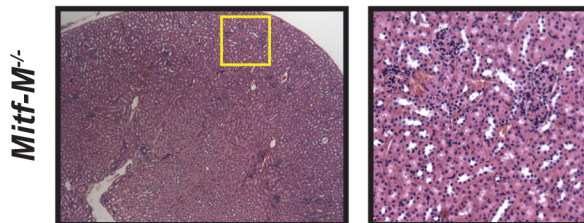

*Mitf-M*<sup>-/-</sup>

**G**

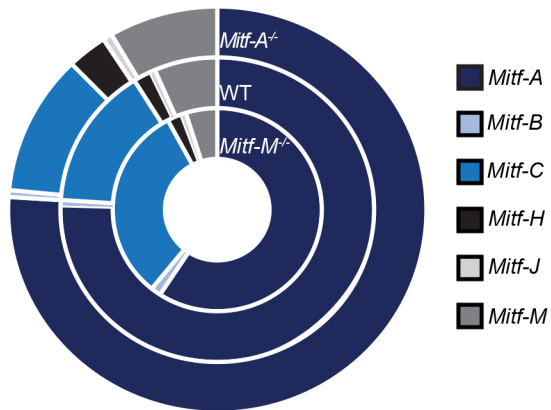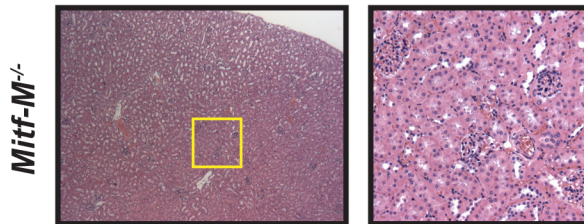

*Mitf-M*<sup>-/-</sup>

Supplement: NIHMS1656713-supplement-Figure_S6.pdf [file NIHMS1656713-supplement-Figure_S6.pdf]

Figure S7

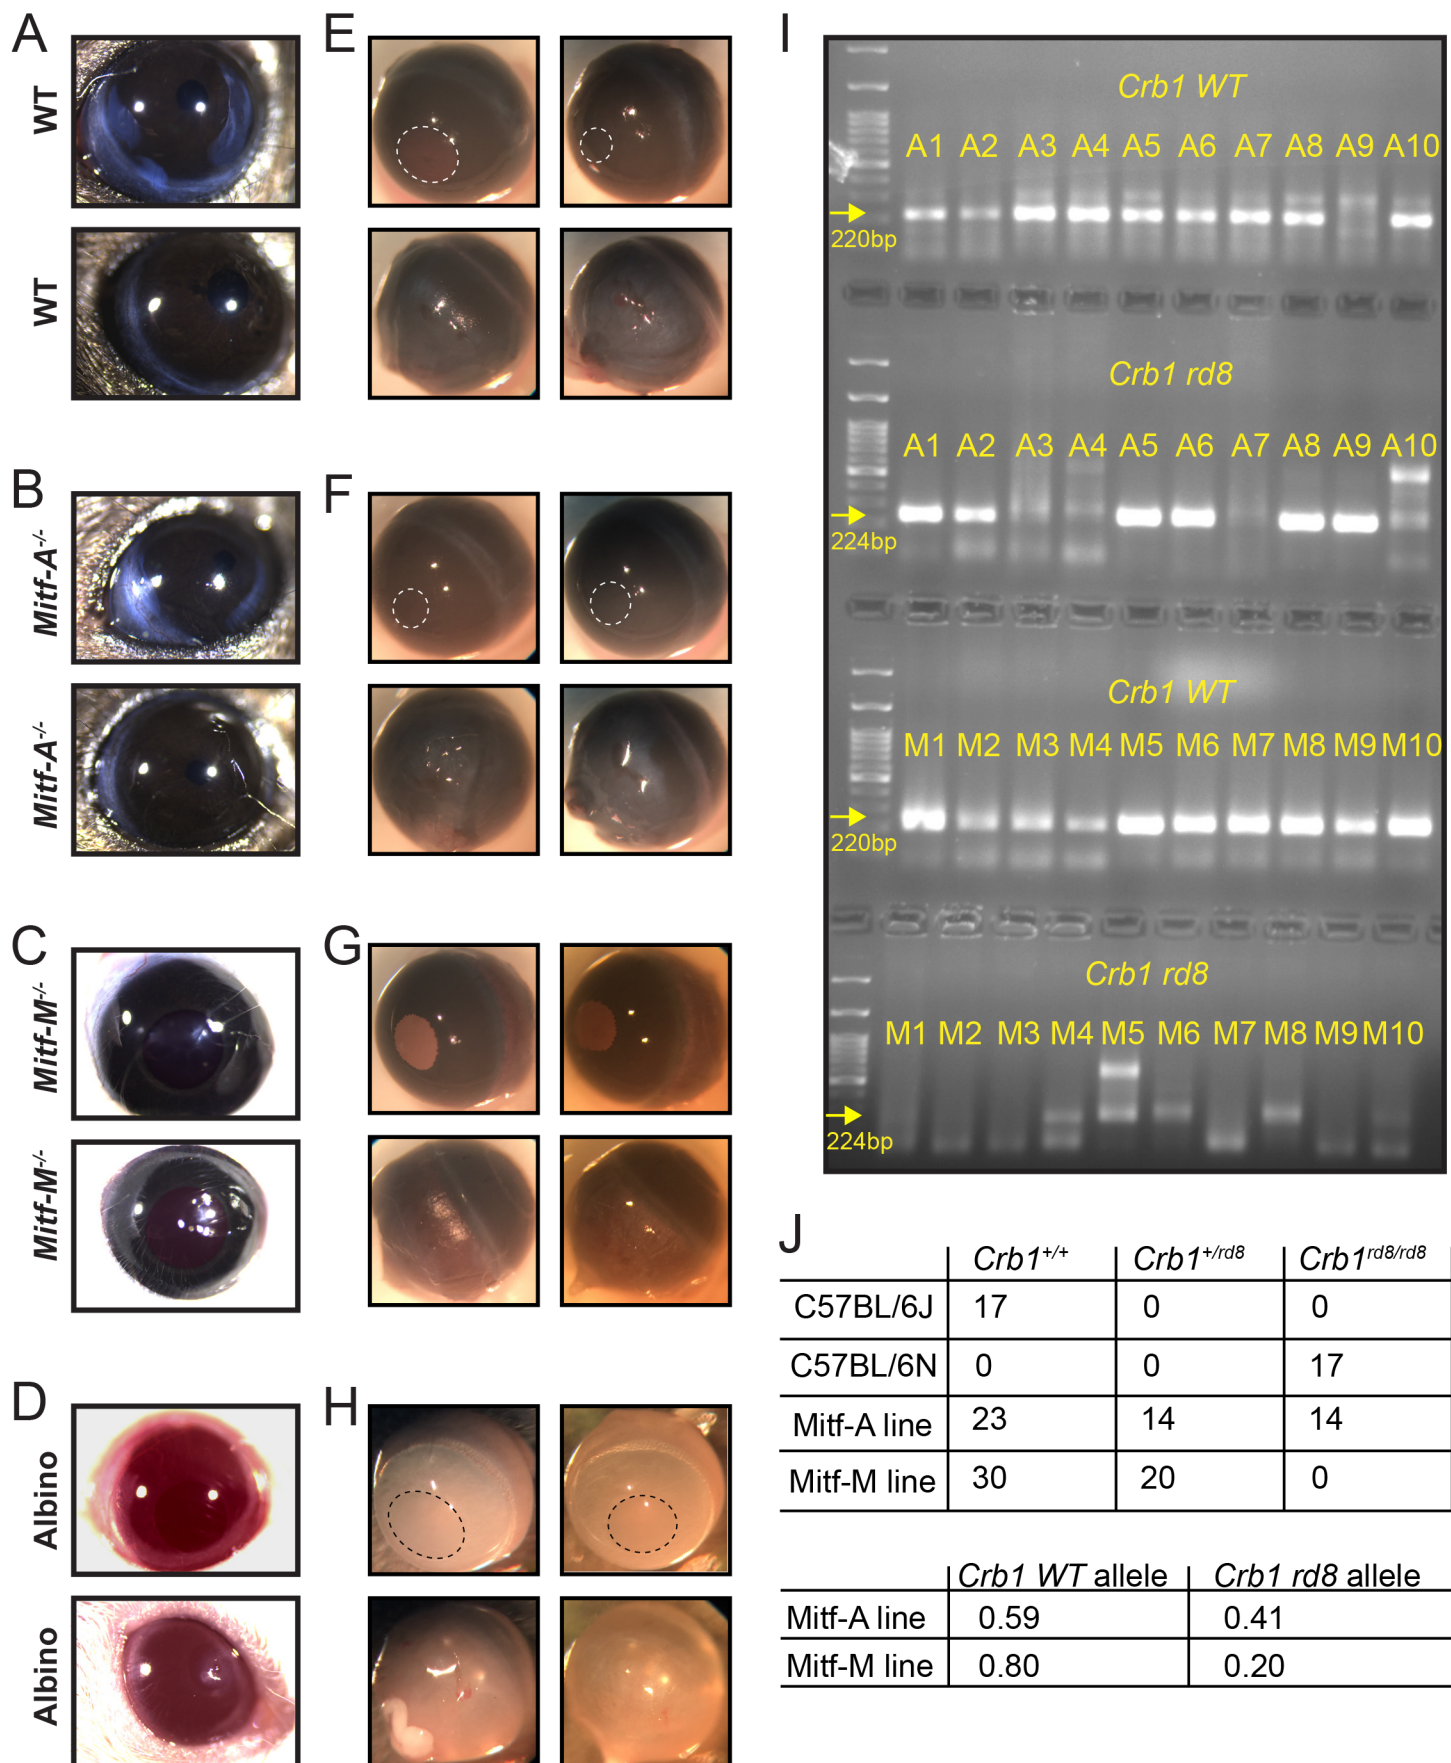

Supplement: NIHMS1656713-supplement-Figure_S7.pdf [file NIHMS1656713-supplement-Figure_S7.pdf]

Figure S8

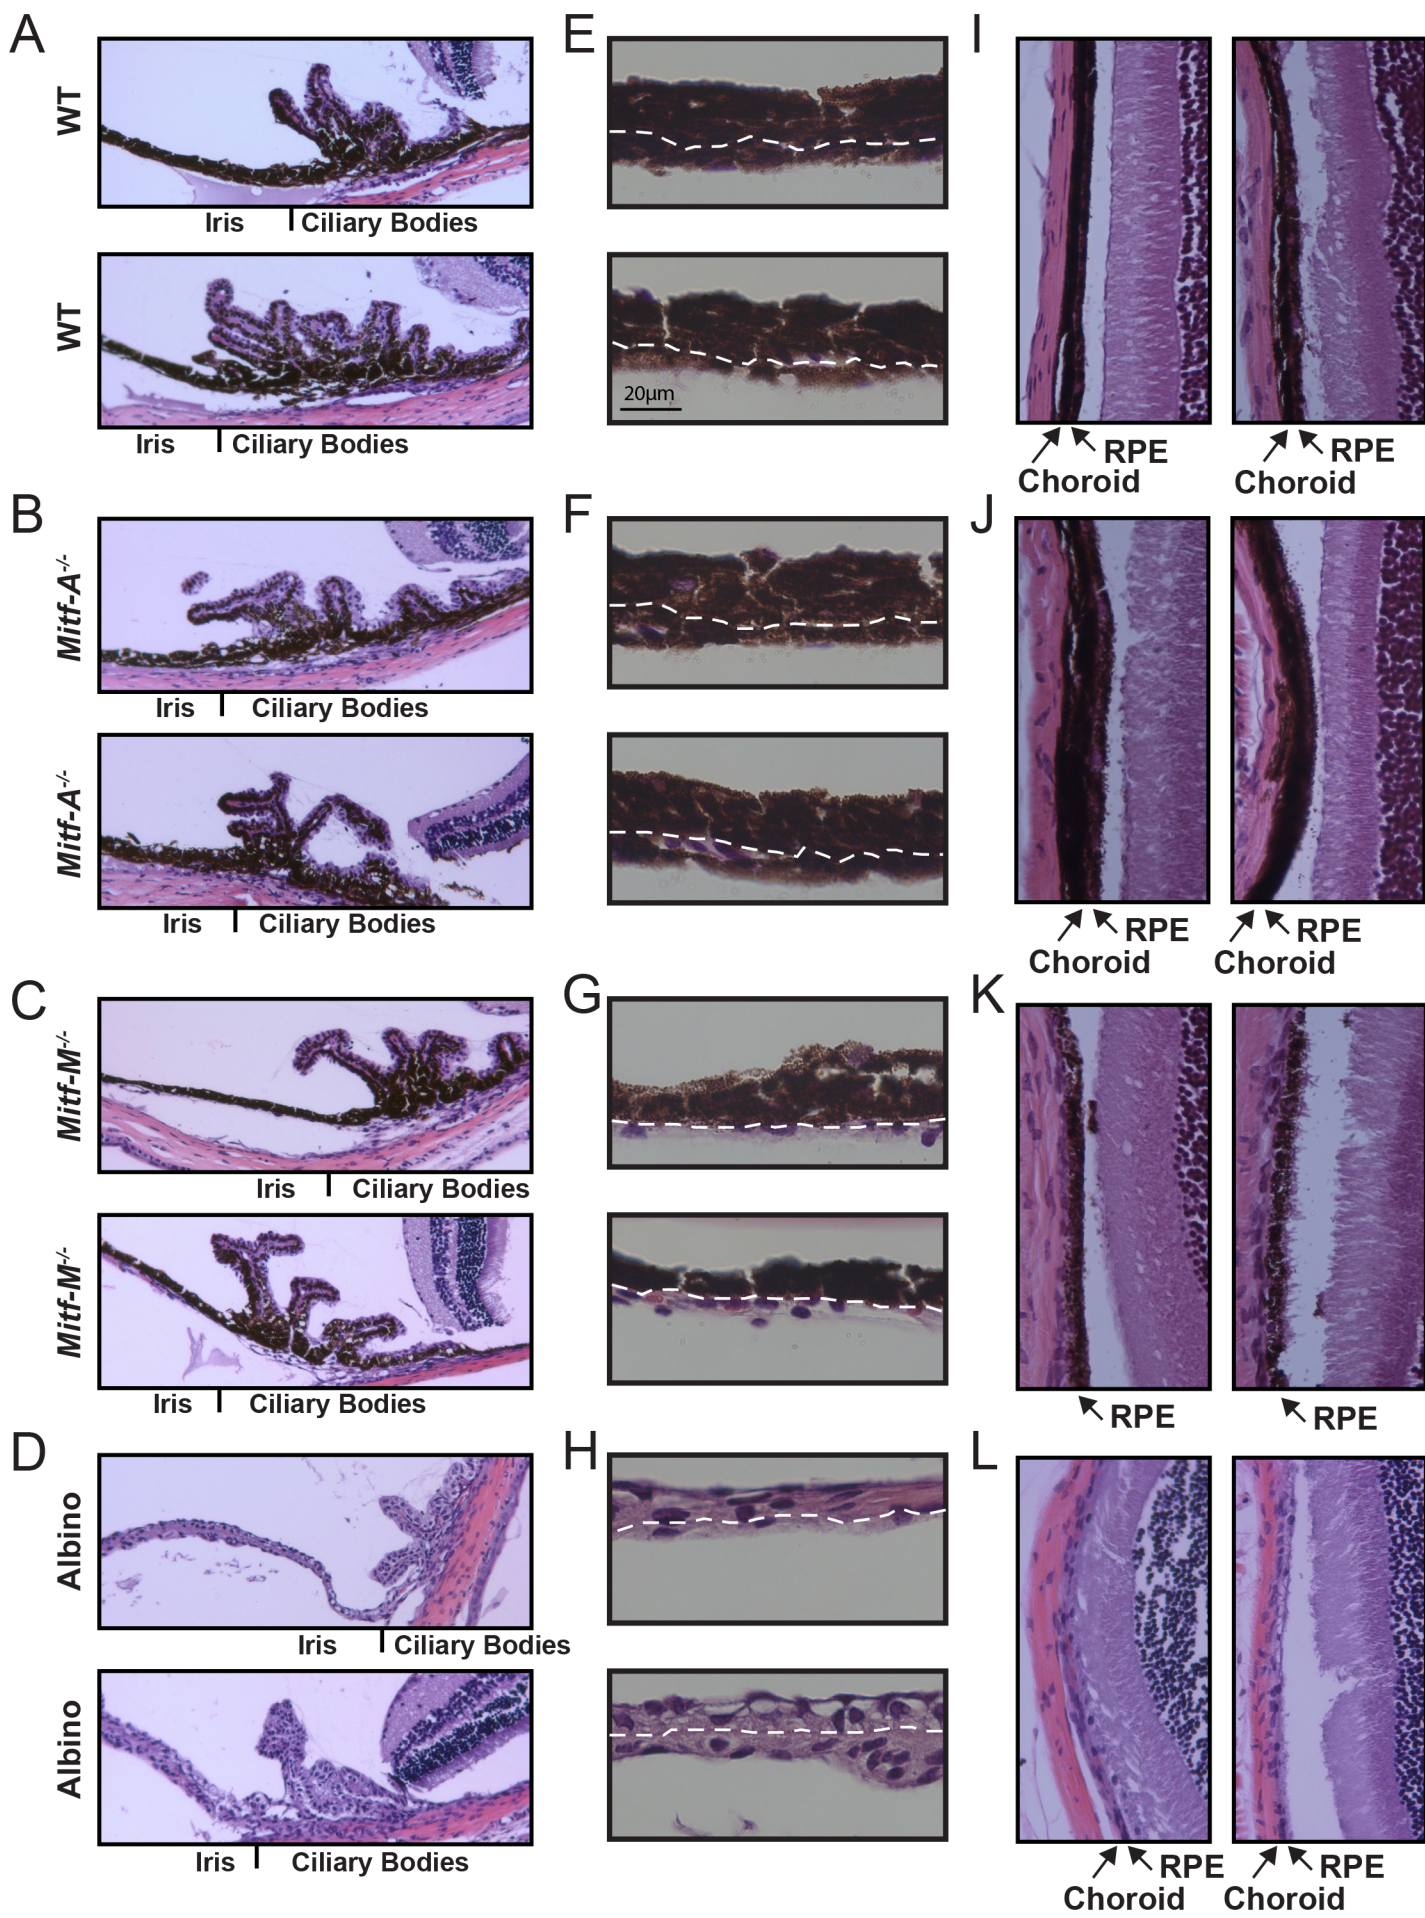

Supplement: NIHMS1656713-supplement-Figure_S8.pdf [file NIHMS1656713-supplement-Figure_S8.pdf]
